# Supplementary material for: A Review of Density Functional Models for the Description of Fe(II) Spin Crossover Complexes
Source: Preprints.org preprint supplement (doi:10.20944/preprints202010.0139.v1), 2020-10-06
Supplement: Supplementary file [file supplementary]

# A review of density functional models for the description of Fe(II)-based spin crossover complexes - Supporting Information

Anton Römer<sup>1</sup>, Lukas Hasecke<sup>1</sup>, Peter Blöchl<sup>2,3</sup> and Ricardo A. Mata<sup>1\*</sup>

<sup>1</sup> Institute of Physical Chemistry, University of Goettingen, D-37077 Göttingen, Germany;

<sup>2</sup> Institute of Theoretical Physics, University of Goettingen, D-37077 Göttingen, Germany;

<sup>3</sup> Institute of Theoretical Physics, Clausthal University of Technology, 38678 Clausthal-Zellerfeld, Germany;

\* Correspondence: rmata@gwdg.de

# 1 Example of input file for CP-PAW calculations

```
!STRUCTURE
!GENERIC LUNIT[AA]=1. !END
!OCCUPATIONS EMPTY=10 NSPIN=2 SPIN[HBAR]=2. CHARGE[E]=2. !END
!CONSTRAINTS
!BOND ATOM1='N_01' ATOM2='N_02' MOVE=T NSTEP=1 VALUE=4.724 !END
!BOND ATOM1='N_03' ATOM2='N_04' MOVE=T NSTEP=1 VALUE=4.724 !END
!BOND ATOM1='N_05' ATOM2='N_06' MOVE=T NSTEP=1 VALUE=4.724 !END
!END
!SPECIES NAME='FE' NPRO=1 1 1 LRHOX=4
!NTBO NOFL=1 0 1 CV=T raug/rcov=1.15 LHFWEIGHT=0.080
!OCKSETUP=F cv=T NDDO=F 31=F BONDIX=F !END
!AUGMENT ID='FE_NDLSS_VO' Z= 26.00000 ZV= 8.
TYPE='NDLSS' RBOX/RCOV= 1.200 RCSM/RCOV= 0.250
RCL/RCOV= 0.800 0.800 0.800 0.800 0.800
!GRID DMIN= 0.100E-05 DMAX= 0.100 RMAX= 20.000 !END
!POT POW= 3.000 RC/RCOV= 0.702 !END
!CORE POW= 3.000 RC/RCOV= 0.702 !END
!END
!END
!SPECIES NAME='N_' NPRO=1 1 1 LRHOX=4 RAD/RCOV=1.4
!NTBO NOFL=1 1 0 CV=T RAUG/RCOV=1.2 LHFWEIGHT=0.080
!OCKSETUP=F CV=T NDDO=F 31=F BONDIX=F !END
!AUGMENT ID='MY_NDLSS_N' EL='N' ZV= 5.
TYPE='NDLSS' RBOX/RCOV=1.2 RCSM/RCOV=.25
RCL/RCOV=0.75 0.75 0.75 0.75
!GRID DMIN=1.E-6 DMAX=.15 RMAX=9. !END
!POT POW=3. RC/RCOV=0.75 VALO_X=-4.3 !END
!CORE POW=2. RC/RCOV=0.75 !END
!END
!END
!SPECIES NAME='C_' NPRO=1 1 1 LRHOX=4 RAD/RCOV=1.4
!NTBO NOFL=1 1 0 CV=T RAUG/RCOV=1.2 LHFWEIGHT=0.080
!OCKSETUP=F CV=T NDDO=F 31=F BONDIX=F !END
!AUGMENT ID='MY_NDLSS_C' EL='C' ZV= 4.
TYPE='NDLSS' RBOX/RCOV=1.2 RCSM/RCOV=.25
RCL/RCOV=0.85 0.85 0.85 0.85
!GRID DMIN=1.E-6 DMAX=.15 RMAX=9. !END
!POT POW=3. RC/RCOV=0.75 VALO_X=-2.7 !END
!CORE POW=2. RC/RCOV=0.75 !END
!END
!END
!SPECIES NAME='H_' M=2. NPRO=1 1 LRHOX=2 RAD/RCOV=1.2
!NTBO NOFL=1 0 CV=T RAUG/RCOV=1.2 LHFWEIGHT=0.080
!OCKSETUP=F CV=T NDDO=F 31=F BONDIX=F !END
!AUGMENT ID='MY_NDLSS_H' EL='H' ZV= 1.
TYPE='NDLSS' RBOX/RCOV=1.2 RCSM/RCOV=.25
RCL/RCOV=1.2 1.2 1.2 1.2
!GRID DMIN=1.E-6 DMAX=.15 RMAX=9. !END
!POT POW=3. RC/RCOV=1. VALO_X=-1.6 !END
!CORE POW=2. RC/RCOV=1. !END
!END
!END
!LATTICE T= 0.00000 6.90000 6.90000
6.90000 0.00000 6.90000
6.90000 6.90000 0.0000 !END
!ATOM NAME= 'FE1' R= 0.78135 3.03110 12.31354 !END
!ATOM NAME= 'N_01' R= -0.38282 3.30934 10.52564 !END
```

```

!ATOM NAME= 'N_02' R=    -0.54065    1.35312    12.07401 !END
!ATOM NAME= 'N_03' R=     2.47003    2.14026    11.31866 !END
!ATOM NAME= 'N_04' R=     2.24845    4.55400    11.93017 !END
!ATOM NAME= 'N_05' R=     1.39773    2.68495    14.34201 !END
!ATOM NAME= 'N_06' R=    -0.53750    4.10138    13.63647 !END
!ATOM NAME= 'H_01' R=    -0.24074    4.17232     9.96608 !END
!ATOM NAME= 'H_02' R=    -1.37693    4.56787    13.24192 !END
!ATOM NAME= 'H_03' R=    -0.33027    2.62500     9.74887 !END
!ATOM NAME= 'H_04' R=    -1.56828    1.49211    12.05918 !END
!ATOM NAME= 'H_05' R=    -0.51014    0.58817    12.77534 !END
!ATOM NAME= 'H_06' R=     3.38076    2.12723    11.81349 !END
!ATOM NAME= 'H_07' R=     2.46407    4.80044    10.94669 !END
!ATOM NAME= 'H_08' R=     2.06357    5.51685    12.27294 !END
!ATOM NAME= 'H_09' R=     2.26719    2.14322    14.51056 !END
!ATOM NAME= 'H_10' R=     2.43216    1.13026    11.08004 !END
!ATOM NAME= 'H_11' R=     1.59441    3.47852    14.97880 !END
!ATOM NAME= 'H_12' R=    -0.99859    3.62098    14.43059 !END
!ATOM NAME= 'H_13' R=    -0.15737    4.92145    14.14454 !END
!ATOM NAME= 'H_14' R=     0.77476    2.13293    14.95971 !END
!ATOM NAME= 'H_15' R=     3.21643    4.45779    12.28865 !END
!ATOM NAME= 'H_16' R=     2.79258    2.49364    10.39885 !END
!ATOM NAME= 'H_17' R=    -1.41404    3.37299    10.61104 !END
!ATOM NAME= 'H_18' R=    -0.44779    0.76295    11.22736 !END
!ISOLATE !END
!END
!EOB

```

## 2 Cartesian coordinates of the $[\text{Fe}^{\text{II}}(\text{NH}_3)_6]^{2+}$ model complexes

Table 1: N-N pair distance 2.5 Å, high-spin.

|    |          |         |          |
|----|----------|---------|----------|
| FE | 0.78135  | 3.03110 | 12.31354 |
| N  | -0.38282 | 3.30934 | 10.52564 |
| N  | -0.54065 | 1.35312 | 12.07401 |
| N  | 2.47003  | 2.14026 | 11.31866 |
| N  | 2.24845  | 4.55400 | 11.93017 |
| N  | 1.39773  | 2.68495 | 14.34201 |
| N  | -0.53750 | 4.10138 | 13.63647 |
| H  | -0.24074 | 4.17232 | 9.96608  |
| H  | -1.37693 | 4.56787 | 13.24192 |
| H  | -0.33027 | 2.62500 | 9.74887  |
| H  | -1.56828 | 1.49211 | 12.05918 |
| H  | -0.51014 | 0.58817 | 12.77534 |
| H  | 3.38076  | 2.12723 | 11.81349 |
| H  | 2.46407  | 4.80044 | 10.94669 |
| H  | 2.06357  | 5.51685 | 12.27294 |
| H  | 2.26719  | 2.14322 | 14.51056 |
| H  | 2.43216  | 1.13026 | 11.08004 |
| H  | 1.59441  | 3.47852 | 14.97880 |
| H  | -0.99859 | 3.62098 | 14.43059 |
| H  | -0.15737 | 4.92145 | 14.14454 |
| H  | 0.77476  | 2.13293 | 14.95971 |
| H  | 3.21643  | 4.45779 | 12.28865 |
| H  | 2.79258  | 2.49364 | 10.39885 |
| H  | -1.41404 | 3.37299 | 10.61104 |
| H  | -0.44779 | 0.76295 | 11.22736 |

Table 2: N-N pair distance 2.5 Å, low-spin.

|    |          |         |          |
|----|----------|---------|----------|
| FE | 0.84908  | 3.00986 | 12.33825 |
| N  | -0.21820 | 3.18064 | 10.70853 |
| N  | -0.23274 | 1.38088 | 12.44341 |
| N  | 2.30667  | 2.18910 | 11.32266 |
| N  | 1.96856  | 4.57742 | 11.97896 |
| N  | 1.69689  | 2.78426 | 14.08995 |
| N  | -0.43064 | 3.94914 | 13.48509 |
| H  | -0.13751 | 4.03582 | 10.12640 |
| H  | -1.31644 | 4.31314 | 13.08462 |
| H  | -0.11354 | 2.47812 | 9.95265  |
| H  | -1.26398 | 1.46192 | 12.52459 |
| H  | -0.07841 | 0.70284 | 13.21368 |
| H  | 3.26584  | 2.24186 | 11.71256 |
| H  | 2.20086  | 4.80525 | 10.99486 |
| H  | 1.64486  | 5.52030 | 12.26859 |
| H  | 2.61013  | 2.29724 | 14.16794 |
| H  | 2.29129  | 1.17003 | 11.12574 |
| H  | 1.92920  | 3.62675 | 14.64836 |
| H  | -0.83198 | 3.45280 | 14.30257 |
| H  | -0.12653 | 4.81892 | 13.96062 |
| H  | 1.19073  | 2.24647 | 14.81745 |
| H  | 2.92325  | 4.61991 | 12.38267 |
| H  | 2.50588  | 2.52244 | 10.36074 |
| H  | -1.25129 | 3.16694 | 10.79513 |
| H  | -0.18743 | 0.70986 | 11.65492 |

Table 3: N-N pair distance 2.6 Å, high-spin.

|    |          |         |          |
|----|----------|---------|----------|
| FE | 0.80639  | 2.99890 | 12.27428 |
| N  | -0.23931 | 3.27765 | 10.40205 |
| N  | -0.53974 | 1.32249 | 12.08914 |
| N  | 2.51466  | 2.04084 | 11.35952 |
| N  | 2.26294  | 4.56074 | 11.94770 |
| N  | 1.40233  | 2.64449 | 14.32132 |
| N  | -0.55356 | 4.14815 | 13.50113 |
| H  | -0.04143 | 4.12676 | 9.83998  |
| H  | -1.36587 | 4.60866 | 13.04915 |
| H  | -0.15357 | 2.57508 | 9.64467  |
| H  | -1.56361 | 1.48181 | 12.04722 |
| H  | -0.53342 | 0.59136 | 12.82482 |
| H  | 3.41654  | 2.05628 | 11.87026 |
| H  | 2.58720  | 4.74733 | 10.98122 |
| H  | 2.01675  | 5.53517 | 12.20576 |
| H  | 2.25595  | 2.08477 | 14.50548 |
| H  | 2.47507  | 1.02040 | 11.17553 |
| H  | 1.60454  | 3.44122 | 14.95264 |
| H  | -1.05466 | 3.70797 | 14.29464 |
| H  | -0.17911 | 4.98077 | 13.99245 |
| H  | 0.75428  | 2.11684 | 14.93438 |
| H  | 3.18587  | 4.51233 | 12.41769 |
| H  | 2.85498  | 2.34630 | 10.42889 |
| H  | -1.27246 | 3.36108 | 10.42278 |
| H  | -0.44308 | 0.69689 | 11.26883 |

Table 4: N-N pair distance 2.6 Å, low-spin.

|    |          |         |          |
|----|----------|---------|----------|
| FE | 0.70250  | 2.87900 | 12.33632 |
| N  | -0.21489 | 2.90053 | 10.59577 |
| N  | -0.37848 | 1.25177 | 12.59927 |
| N  | 2.20918  | 1.89539 | 11.54440 |
| N  | 1.81848  | 4.44170 | 11.89491 |
| N  | 1.46814  | 2.82949 | 14.15056 |
| N  | -0.68469 | 3.95787 | 13.22791 |
| H  | -0.06096 | 3.69293 | 9.94483  |
| H  | -1.52133 | 4.26315 | 12.69595 |
| H  | -0.05517 | 2.12281 | 9.92882  |
| H  | -1.41257 | 1.33234 | 12.61577 |
| H  | -0.25822 | 0.68530 | 13.45964 |
| H  | 3.14620  | 2.00380 | 11.97455 |
| H  | 2.18942  | 4.52753 | 10.93087 |
| H  | 1.42115  | 5.39567 | 11.98495 |
| H  | 2.36198  | 2.33098 | 14.31965 |
| H  | 2.18401  | 0.85881 | 11.50989 |
| H  | 1.70165  | 3.72439 | 14.61998 |
| H  | -1.16861 | 3.56790 | 14.05805 |
| H  | -0.41769 | 4.87930 | 13.62101 |
| H  | 0.91412  | 2.39477 | 14.91127 |
| H  | 2.70174  | 4.59532 | 12.41644 |
| H  | 2.46936  | 2.07328 | 10.55620 |
| H  | -1.25177 | 2.90353 | 10.58571 |
| H  | -0.29206 | 0.48555 | 11.90690 |

Table 5: N-N pair distance 2.7 Å, high-spin.

|    |          |         |         |
|----|----------|---------|---------|
| FE | 8.11007  | 6.62689 | 5.90026 |
| N  | 6.92941  | 7.01594 | 7.68232 |
| N  | 7.63022  | 4.63339 | 6.62328 |
| N  | 6.38862  | 6.81931 | 4.58397 |
| N  | 8.19922  | 8.70264 | 5.26519 |
| N  | 10.06174 | 6.64575 | 6.87158 |
| N  | 9.46016  | 5.97546 | 4.32638 |
| H  | 9.08598  | 5.80548 | 3.37462 |
| H  | 8.96258  | 9.31110 | 5.61376 |
| H  | 10.27311 | 6.56512 | 4.06978 |
| H  | 10.62989 | 5.77987 | 6.91594 |
| H  | 10.11641 | 6.91487 | 7.87168 |
| H  | 6.56070  | 7.03057 | 3.58366 |
| H  | 7.40091  | 9.32032 | 5.49929 |
| H  | 7.96977  | 3.81216 | 6.08952 |
| H  | 6.69739  | 7.99719 | 7.92330 |
| H  | 5.76941  | 5.99836 | 4.45195 |
| H  | 6.63325  | 4.35868 | 6.69149 |
| H  | 7.31885  | 6.73041 | 8.59944 |
| H  | 5.98199  | 6.60614 | 7.77644 |
| H  | 7.94061  | 4.34047 | 7.56814 |
| H  | 5.65852  | 7.53117 | 4.76997 |
| H  | 8.27710  | 8.92486 | 4.25539 |
| H  | 10.78769 | 7.29187 | 6.51160 |
| H  | 9.95441  | 5.07323 | 4.45165 |

Table 6: N-N pair distance 2.7 Å, low-spin.

|    |          |         |         |
|----|----------|---------|---------|
| FE | 8.09650  | 6.59150 | 5.88097 |
| N  | 7.23944  | 7.21542 | 7.55215 |
| N  | 7.76871  | 4.76060 | 6.56071 |
| N  | 6.34659  | 6.62208 | 4.94831 |
| N  | 8.31422  | 8.45012 | 5.22395 |
| N  | 9.88679  | 6.60122 | 6.73455 |
| N  | 9.02845  | 5.91160 | 4.26940 |
| H  | 8.49269  | 5.73870 | 3.39902 |
| H  | 9.16648  | 8.98690 | 5.46919 |
| H  | 9.79952  | 6.47542 | 3.86665 |
| H  | 10.38786 | 5.70282 | 6.86360 |
| H  | 9.98714  | 6.97484 | 7.69652 |
| H  | 6.33646  | 6.77584 | 3.92305 |
| H  | 7.60668  | 9.15700 | 5.49524 |
| H  | 7.84164  | 3.95505 | 5.91253 |
| H  | 7.45128  | 8.16955 | 7.89866 |
| H  | 5.73717  | 5.78426 | 4.98081 |
| H  | 6.83680  | 4.54886 | 6.96256 |
| H  | 7.42305  | 6.69179 | 8.42767 |
| H  | 6.20488  | 7.25791 | 7.61168 |
| H  | 8.35711  | 4.39261 | 7.33120 |
| H  | 5.64367  | 7.33520 | 5.21662 |
| H  | 8.31629  | 8.61775 | 4.20069 |
| H  | 10.65000 | 7.13878 | 6.28412 |
| H  | 9.51788  | 5.00000 | 4.32933 |

Table 7: N-N pair distance 2.8 Å, high-spin.

|    |          |         |         |
|----|----------|---------|---------|
| FE | 8.08091  | 6.59883 | 5.92752 |
| N  | 6.87245  | 7.05523 | 7.68722 |
| N  | 7.59348  | 4.58055 | 6.59388 |
| N  | 6.35472  | 6.74433 | 4.58644 |
| N  | 8.23774  | 8.68549 | 5.31130 |
| N  | 9.98238  | 6.60132 | 7.01563 |
| N  | 9.43954  | 5.96423 | 4.34379 |
| H  | 9.08518  | 5.84944 | 3.37676 |
| H  | 8.99305  | 9.28127 | 5.69645 |
| H  | 10.27848 | 6.53680 | 4.13751 |
| H  | 10.58247 | 5.75626 | 7.01165 |
| H  | 9.96775  | 6.77533 | 8.03774 |
| H  | 6.53006  | 6.96717 | 3.58923 |
| H  | 7.43477  | 9.30882 | 5.51121 |
| H  | 7.85946  | 3.78232 | 5.98899 |
| H  | 6.81880  | 8.04092 | 8.00268 |
| H  | 5.76103  | 5.90662 | 4.44502 |
| H  | 6.59738  | 4.33374 | 6.73825 |
| H  | 7.12517  | 6.62136 | 8.59369 |
| H  | 5.85900  | 6.83663 | 7.68396 |
| H  | 7.97544  | 4.23029 | 7.49157 |
| H  | 5.60408  | 7.43558 | 4.76846 |
| H  | 8.36168  | 8.90956 | 4.30665 |
| H  | 10.70046 | 7.30429 | 6.76227 |
| H  | 9.90110  | 5.04198 | 4.44494 |

Table 8: N-N pair distance 2.8 Å, low-spin.

|    |          |         |         |
|----|----------|---------|---------|
| FE | 8.09750  | 6.58190 | 5.91287 |
| N  | 7.18000  | 7.26004 | 7.54556 |
| N  | 7.73184  | 4.71502 | 6.51715 |
| N  | 6.38601  | 6.56397 | 4.89131 |
| N  | 8.39805  | 8.46279 | 5.32196 |
| N  | 9.82926  | 6.56698 | 6.90882 |
| N  | 9.05923  | 5.91425 | 4.29725 |
| H  | 8.55387  | 5.85680 | 3.39443 |
| H  | 9.07353  | 9.05502 | 5.83905 |
| H  | 9.89780  | 6.43188 | 3.97626 |
| H  | 10.44895 | 5.74279 | 6.80722 |
| H  | 9.81274  | 6.62291 | 7.94390 |
| H  | 6.25570  | 7.24736 | 4.12326 |
| H  | 7.58954  | 9.11085 | 5.32711 |
| H  | 7.75340  | 3.94409 | 5.82510 |
| H  | 7.51008  | 8.14960 | 7.96287 |
| H  | 6.13359  | 5.70051 | 4.37644 |
| H  | 6.81011  | 4.51285 | 6.94590 |
| H  | 7.18780  | 6.67415 | 8.40041 |
| H  | 6.16598  | 7.47316 | 7.51355 |
| H  | 8.33846  | 4.29046 | 7.24237 |
| H  | 5.48916  | 6.71398 | 5.38856 |
| H  | 8.73906  | 8.64390 | 4.35993 |
| H  | 10.52842 | 7.30947 | 6.72566 |
| H  | 9.46460  | 4.96048 | 4.31064 |

Table 9: N-N pair distance 2.9 Å, high-spin.

|    |          |         |          |
|----|----------|---------|----------|
| FE | 1.67617  | 6.62173 | -0.33134 |
| N  | 2.23256  | 4.50201 | -0.23771 |
| N  | 3.71924  | 6.89992 | 0.43249  |
| N  | 0.83583  | 6.53656 | 1.69445  |
| N  | -0.39280 | 6.13794 | -0.90188 |
| N  | 1.34788  | 8.77909 | -0.48142 |
| N  | 2.30636  | 6.84193 | -2.41484 |
| H  | 1.43692  | 6.73284 | 2.51523  |
| H  | 3.16628  | 7.37465 | -2.63981 |
| H  | 0.61237  | 9.15046 | -1.10973 |
| H  | 1.08734  | 9.28470 | 0.38445  |
| H  | 0.40386  | 5.65427 | 2.02494  |
| H  | -1.14278 | 6.84119 | -0.77141 |
| H  | -0.59448 | 5.87640 | -1.88462 |
| H  | 3.99945  | 7.83292 | 0.78697  |
| H  | 1.56385  | 3.77787 | -0.55688 |
| H  | 4.01179  | 6.33613 | 1.25148  |
| H  | 3.05945  | 4.20610 | -0.78751 |
| H  | 2.51089  | 5.97747 | -2.94787 |
| H  | -0.85366 | 5.33385 | -0.43794 |
| H  | 0.05526  | 7.18199 | 1.91240  |
| H  | 2.13472  | 9.38336 | -0.78009 |
| H  | 1.65924  | 7.28836 | -3.08969 |
| H  | 4.53417  | 6.71526 | -0.18061 |
| H  | 2.49357  | 4.08256 | 0.67332  |

Table 10: N-N pair distance 2.9 Å, low-spin.

|    |          |         |          |
|----|----------|---------|----------|
| FE | 1.70831  | 6.57455 | -0.33572 |
| N  | 1.96093  | 4.58669 | -0.37424 |
| N  | 3.58304  | 6.89667 | 0.29069  |
| N  | 1.13100  | 6.43581 | 1.57700  |
| N  | -0.16317 | 6.32122 | -1.01557 |
| N  | 1.38403  | 8.55165 | -0.26413 |
| N  | 2.35764  | 6.65496 | -2.22984 |
| H  | 1.70596  | 5.85579 | 2.21485  |
| H  | 2.56301  | 7.57467 | -2.66128 |
| H  | 1.42298  | 9.10763 | -1.13777 |
| H  | 0.46642  | 8.87983 | 0.08840  |
| H  | 0.20068  | 6.03569 | 1.79823  |
| H  | -0.96133 | 6.38945 | -0.35845 |
| H  | -0.50241 | 6.97498 | -1.74434 |
| H  | 3.73332  | 7.30291 | 1.23228  |
| H  | 1.87992  | 4.08914 | -1.27962 |
| H  | 4.24569  | 6.10285 | 0.35573  |
| H  | 2.85942  | 4.18006 | -0.05545 |
| H  | 3.24735  | 6.17380 | -2.45542 |
| H  | -0.41514 | 5.42655 | -1.47398 |
| H  | 1.07213  | 7.29489 | 2.15336  |
| H  | 2.00079  | 9.14258 | 0.32285  |
| H  | 1.76719  | 6.25995 | -2.98437 |
| H  | 4.17294  | 7.54802 | -0.25837 |
| H  | 1.31608  | 4.00057 | 0.18641  |



Table 11: N-N pair distance 3.0 Å, high-spin.

|    |          |         |          |
|----|----------|---------|----------|
| FE | 1.65567  | 6.63817 | -0.34177 |
| N  | 2.11809  | 4.49235 | -0.15053 |
| N  | 3.67079  | 6.97655 | 0.49547  |
| N  | 0.76899  | 6.61274 | 1.67726  |
| N  | -0.38187 | 6.17608 | -1.05848 |
| N  | 1.31852  | 8.80214 | -0.53927 |
| N  | 2.42272  | 6.72262 | -2.39824 |
| H  | 1.36836  | 6.77848 | 2.50582  |
| H  | 3.24523  | 7.31423 | -2.61521 |
| H  | 0.63536  | 9.15620 | -1.23316 |
| H  | 0.97790  | 9.31056 | 0.29632  |
| H  | 0.27863  | 5.76028 | 2.00428  |
| H  | -1.10951 | 6.91348 | -1.04450 |
| H  | -0.51035 | 5.84514 | -2.03219 |
| H  | 3.89555  | 7.90231 | 0.90367  |
| H  | 1.45877  | 3.79380 | -0.53859 |
| H  | 3.97002  | 6.38421 | 1.29159  |
| H  | 2.99072  | 4.15091 | -0.59281 |
| H  | 2.75112  | 5.83379 | -2.81712 |
| H  | -0.91324 | 5.42878 | -0.57540 |
| H  | 0.02485  | 7.30487 | 1.87801  |
| H  | 2.12025  | 9.41418 | -0.77621 |
| H  | 1.79563  | 7.03224 | -3.16261 |
| H  | 4.50772  | 6.86109 | -0.10426 |
| H  | 2.24984  | 4.07815 | 0.79018  |

Table 12: N-N pair distance 3.0 Å, low-spin.

|    |          |         |          |
|----|----------|---------|----------|
| FE | 1.73145  | 6.56618 | -0.33890 |
| N  | 1.99308  | 4.56064 | -0.39675 |
| N  | 3.59994  | 6.99248 | 0.31288  |
| N  | 1.18242  | 6.40375 | 1.60050  |
| N  | -0.12183 | 6.27105 | -1.09779 |
| N  | 1.31853  | 8.54246 | -0.21217 |
| N  | 2.41692  | 6.62553 | -2.24155 |
| H  | 1.74895  | 5.78098 | 2.20403  |
| H  | 2.61733  | 7.54087 | -2.68409 |
| H  | 1.34616  | 9.12799 | -1.06651 |
| H  | 0.37948  | 8.81043 | 0.13377  |
| H  | 0.24110  | 6.03790 | 1.83373  |
| H  | -0.94455 | 6.28908 | -0.46849 |
| H  | -0.45207 | 6.94410 | -1.81252 |
| H  | 3.71829  | 7.44479 | 1.23737  |
| H  | 1.89883  | 4.06778 | -1.30306 |
| H  | 4.29084  | 6.22833 | 0.42216  |
| H  | 2.89650  | 4.15382 | -0.09267 |
| H  | 3.31863  | 6.15376 | -2.43551 |
| H  | -0.32720 | 5.38720 | -1.59769 |
| H  | 1.17459  | 7.24847 | 2.19987  |
| H  | 1.89669  | 9.14096 | 0.40494  |
| H  | 1.84729  | 6.20885 | -2.99998 |
| H  | 4.16954  | 7.64096 | -0.25971 |
| H  | 1.35563  | 3.97600 | 0.17315  |

Table 13: N-N pair distance 3.1 Å, high-spin.

|    |          |         |          |
|----|----------|---------|----------|
| FE | 1.67865  | 6.57736 | -0.37345 |
| N  | 2.04971  | 4.38831 | -0.37834 |
| N  | 3.66827  | 6.88660 | 0.48672  |
| N  | 0.87690  | 6.45765 | 1.66167  |
| N  | -0.32198 | 6.23306 | -1.18819 |
| N  | 1.31621  | 8.76746 | -0.42901 |
| N  | 2.48935  | 6.70392 | -2.42275 |
| H  | 1.23321  | 5.72775 | 2.30498  |
| H  | 2.89857  | 7.60535 | -2.72765 |
| H  | 0.82223  | 9.15545 | -1.25340 |
| H  | 0.73853  | 9.20382 | 0.31233  |
| H  | -0.13757 | 6.28097 | 1.77311  |
| H  | -1.13118 | 6.29156 | -0.54539 |
| H  | -0.67677 | 6.85228 | -1.93966 |
| H  | 3.86472  | 7.76608 | 0.99795  |
| H  | 1.89138  | 3.86781 | -1.26060 |
| H  | 4.02935  | 6.21279 | 1.18605  |
| H  | 2.99910  | 4.03238 | -0.16378 |
| H  | 3.27588  | 6.07716 | -2.67103 |
| H  | -0.53258 | 5.31757 | -1.62535 |
| H  | 0.96355  | 7.27689 | 2.28995  |
| H  | 2.11950  | 9.42150 | -0.41096 |
| H  | 1.88019  | 6.52290 | -3.24073 |
| H  | 4.47664  | 6.89398 | -0.16031 |
| H  | 1.50450  | 3.77854 | 0.25793  |

Table 14: N-N pair distance 3.1 Å, low-spin.

|    |          |         |          |
|----|----------|---------|----------|
| FE | 1.74681  | 6.59135 | -0.38339 |
| N  | 1.86318  | 4.55940 | -0.56911 |
| N  | 3.62144  | 6.93933 | 0.35497  |
| N  | 1.17047  | 6.31638 | 1.55526  |
| N  | -0.08997 | 6.45963 | -1.27322 |
| N  | 1.39164  | 8.58413 | -0.09661 |
| N  | 2.52523  | 6.68398 | -2.26776 |
| H  | 1.72296  | 5.64145 | 2.11353  |
| H  | 2.80957  | 7.60047 | -2.65881 |
| H  | 1.43027  | 9.23270 | -0.90336 |
| H  | 0.45994  | 8.84295 | 0.27438  |
| H  | 0.22094  | 5.95524 | 1.75976  |
| H  | -0.94613 | 6.47433 | -0.69044 |
| H  | -0.33709 | 7.20905 | -1.94357 |
| H  | 3.72192  | 7.33074 | 1.30869  |
| H  | 1.77961  | 4.13276 | -1.50915 |
| H  | 4.29750  | 6.15827 | 0.43189  |
| H  | 2.71302  | 4.06186 | -0.24708 |
| H  | 3.40127  | 6.15776 | -2.43535 |
| H  | -0.31134 | 5.63271 | -1.85611 |
| H  | 1.17662  | 7.11908 | 2.20933  |
| H  | 1.98806  | 9.11718 | 0.56129  |
| H  | 1.96602  | 6.34038 | -3.06893 |
| H  | 4.21304  | 7.61251 | -0.16394 |
| H  | 1.14944  | 4.00009 | -0.06900 |

### 3 Absolute energies from the SPE calculations on the $[\text{Fe}^{\text{II}}(\text{NH}_3)_6]^{2+}$ model complexes

#### 3.1 Using PBE, BP86, TPSS and M06-L

|           | PBE               | BP86              | TPSS              | M06-L             |
|-----------|-------------------|-------------------|-------------------|-------------------|
| 2.5 Å, HS | -1611.31394182704 | -1612.21181225286 | -1612.04541650429 | -1611.8312296385  |
| 2.5 Å, LS | -1611.33504264393 | -1612.23203305343 | -1612.06943423148 | -1611.82617037154 |
| 2.6 Å, HS | -1611.32669581554 | -1612.22458186504 | -1612.05819837707 | -1611.84543307343 |
| 2.6 Å, LS | -1611.34489446973 | -1612.24198183326 | -1612.0794918585  | -1611.83691670181 |
| 2.7 Å, HS | -1611.33581983985 | -1612.23372142758 | -1612.06728580552 | -1611.85489181217 |
| 2.7 Å, LS | -1611.35084864319 | -1612.248039278   | -1612.08563838146 | -1611.84367729907 |
| 2.8 Å, HS | -1611.34174799896 | -1612.23970247011 | -1612.07307793425 | -1611.86089127433 |
| 2.8 Å, LS | -1611.35387535836 | -1612.25111882385 | -1612.08887837626 | -1611.84808257695 |
| 2.9 Å, HS | -1611.34546305524 | -1612.2434864492  | -1612.07701036119 | -1611.86492073313 |
| 2.9 Å, LS | -1611.35464639159 | -1612.25190109507 | -1612.08984512315 | -1611.85059770242 |
| 3.0 Å, HS | -1611.34789125528 | -1612.24553346853 | -1612.07906433559 | -1611.86717974695 |
| 3.0 Å, LS | -1611.35434760779 | -1612.25164217608 | -1612.0897802799  | -1611.85213183204 |
| 3.1 Å, HS | -1611.34703690399 | -1612.24497736748 | -1612.07845143695 | -1611.86621919722 |
| 3.1 Å, LS | -1611.35214635849 | -1612.2494748855  | -1612.08773294594 | -1611.85178194351 |

#### 3.2 Using B3LYP with 10, 15, 20 and 25% exact exchange

|           | B3LYP(10%)        | B3LYP(15)         | B3LYP(20)         | B3LYP(25%)        |
|-----------|-------------------|-------------------|-------------------|-------------------|
| 2.5 Å, HS | -1610.94952594267 | -1611.33284328771 | -1611.71736748635 | -1612.10304650325 |
| 2.5 Å, LS | -1610.95982682662 | -1611.33402051468 | -1611.70983687101 | -1612.08721943538 |
| 2.6 Å, HS | -1610.96271412583 | -1611.34636099819 | -1611.73120044291 | -1612.11718169432 |
| 2.6 Å, LS | -1610.97047172445 | -1611.34506518765 | -1611.72127420517 | -1612.09904226486 |
| 2.7 Å, HS | -1610.97217288164 | -1611.35610715504 | -1611.74122273941 | -1612.12747017399 |
| 2.7 Å, LS | -1610.97709332561 | -1611.35202710027 | -1611.72857203556 | -1612.1066711232  |
| 2.8 Å, HS | -1610.97826791859 | -1611.3624037942  | -1611.74773319818 | -1612.13415231224 |
| 2.8 Å, LS | -1610.98071558478 | -1611.35597638502 | -1611.73284655096 | -1612.11126838357 |
| 2.9 Å, HS | -1610.98218728739 | -1611.36649115501 | -1611.75196277805 | -1612.13855274433 |
| 2.9 Å, LS | -1610.98194828978 | -1611.35747163195 | -1611.73460230896 | -1612.11328218151 |
| 3.0 Å, HS | -1610.98431129668 | -1611.36873438923 | -1611.75432275792 | -1612.14102661488 |
| 3.0 Å, LS | -1610.98243579007 | -1611.35838715145 | -1611.7359427516  | -1612.11504346795 |
| 3.1 Å, HS | -1610.98381943511 | -1611.36825944887 | -1611.75385919713 | -1612.14057173513 |
| 3.1 Å, LS | -1610.98093853655 | -1611.35728324445 | -1611.73523147549 | -1612.11472270883 |

### 3.3 Using PBE0 with 10, 15, 20 and 25% exact exchange

|           | PBE0(10%)         | PBE0(15%)         | PBE0(20%)         | PBE0(25%)         |
|-----------|-------------------|-------------------|-------------------|-------------------|
| 2.5 Å, HS | -1610.19032949751 | -1610.57443830335 | -1610.95974208347 | -1611.34619005557 |
| 2.5 Å, LS | -1610.2034804874  | -1610.57788548789 | -1610.95390384975 | -1611.33148349425 |
| 2.6 Å, HS | -1610.20265934361 | -1610.58710726414 | -1610.97273611442 | -1611.35949646403 |
| 2.6 Å, LS | -1610.2128425653  | -1610.58765273006 | -1610.96407110037 | -1611.34204471464 |
| 2.7 Å, HS | -1610.21125206993 | -1610.59599630844 | -1610.98191177494 | -1611.36894841734 |
| 2.7 Å, LS | -1610.21828956788 | -1610.59344298127 | -1610.97020205597 | -1611.34851340839 |
| 2.8 Å, HS | -1610.21681329215 | -1610.60171221025 | -1610.98781482125 | -1611.37504807853 |
| 2.8 Å, LS | -1610.22093900877 | -1610.59642377858 | -1610.97351412287 | -1611.35215618729 |
| 2.9 Å, HS | -1610.2202669135  | -1610.60539465663 | -1610.99171872331 | -1611.37907052025 |
| 2.9 Å, LS | -1610.2215300658  | -1610.59728131866 | -1610.9746375486  | -1611.35354408794 |
| 3.0 Å, HS | -1610.22235497658 | -1610.60760914915 | -1610.9937569479  | -1611.38151452511 |
| 3.0 Å, LS | -1610.22070085199 | -1610.59688653808 | -1610.9746765613  | -1611.35401470996 |
| 3.1 Å, HS | -1610.22167243693 | -1610.60692282577 | -1610.99334317653 | -1611.38087573236 |
| 3.1 Å, LS | -1610.217934554   | -1610.5945209746  | -1610.97271333933 | -1611.35245399318 |

### 3.4 Using CAM-B3LYP with $(\alpha_0, \mu_0)$ , $(\alpha_1, \mu_0)$ , $(\alpha_2, \mu_0)$ , $(\alpha_0, \mu_1)$ , $(\alpha_0, \mu_2)$

|           | CAM-B3LYP         | $(\alpha_0, \mu_1)$ | $(\alpha_0, \mu_2)$ | $(\alpha_1, \mu_0)$ | $(\alpha_2, \mu_0)$ |
|-----------|-------------------|---------------------|---------------------|---------------------|---------------------|
| 2.5 Å, HS | -1611.89097577089 | -1611.38747833672   | -1611.34299951079   | -1611.32222823265   | -1611.39591141635   |
| 2.5 Å, LS | -1611.88502938301 | -1611.38712082845   | -1611.3352590941    | -1611.32594234899   | -1611.38469827048   |
| 2.6 Å, HS | -1611.90462900745 | -1611.40066280693   | -1611.35661406234   | -1611.3354673646    | -1611.40946764075   |
| 2.6 Å, LS | -1611.89623137055 | -1611.39789258956   | -1611.3464137077    | -1611.33666790873   | -1611.39587739764   |
| 2.7 Å, HS | -1611.9143714551  | -1611.40998418537   | -1611.36627554501   | -1611.34482354735   | -1611.41908369007   |
| 2.7 Å, LS | -1611.9033706846  | -1611.40465986678   | -1611.35349645168   | -1611.34340933566   | -1611.40296421048   |
| 2.8 Å, HS | -1611.92072680228 | -1611.4160269421    | -1611.3725759077    | -1611.35090858822   | -1611.4253387383    |
| 2.8 Å, LS | -1611.90750911106 | -1611.40849385138   | -1611.35757995123   | -1611.34716155503   | -1611.40710894382   |
| 2.9 Å, HS | -1611.92487100184 | -1611.41991707505   | -1611.37666955806   | -1611.35481991459   | -1611.42940894953   |
| 2.9 Å, LS | -1611.90921614652 | -1611.40998443155   | -1611.35926313759   | -1611.34857109198   | -1611.40886083442   |
| 3.0 Å, HS | -1611.92716104295 | -1611.42202476781   | -1611.37888774683   | -1611.35693627744   | -1611.43160961759   |
| 3.0 Å, LS | -1611.91037039356 | -1611.41074158913   | -1611.36034750735   | -1611.34923305786   | -1611.41001186591   |
| 3.1 Å, HS | -1611.92671882773 | -1611.42158427981   | -1611.37845776168   | -1611.35648840979   | -1611.43118697517   |
| 3.1 Å, LS | -1611.90942223563 | -1611.40943538083   | -1611.35931037198   | -1611.34781841344   | -1611.40905120747   |

### 3.5 Using PBE0r with 8, 9, 11 and 12.5% exact exchange

|           | PBE0r(8.00%) | PBE0r(9.00%) | PBE0r(11.00%) | PBE0r(12.50%) |
|-----------|--------------|--------------|---------------|---------------|
| 2.5 Å, HS | -92.3344956  | -92.3300055  | -92.3233405   | -92.320538    |
| 2.5 Å, LS | -92.3311828  | -92.3232491  | -92.3100367   | -92.3026846   |
| 2.6 Å, HS | -92.3462091  | -92.3414424  | -92.3341483   | -92.3308191   |
| 2.6 Å, LS | -92.3405257  | -92.3323971  | -92.3187345   | -92.3109804   |
| 2.7 Å, HS | -92.3543663  | -92.3493436  | -92.3414466   | -92.3376116   |
| 2.7 Å, LS | -92.3460165  | -92.3377     | -92.3235982   | -92.3154653   |
| 2.8 Å, HS | -92.3588657  | -92.3536212  | -92.345276    | -92.3410611   |
| 2.8 Å, LS | -92.3480944  | -92.3396194  | -92.3251619   | -92.3167136   |
| 2.9 Å, HS | -92.3611994  | -92.355807   | -92.347126    | -92.3426369   |
| 2.9 Å, LS | -92.3481381  | -92.3395613  | -92.3248698   | -92.316218    |
| 3.0 Å, HS | -92.3628447  | -92.3573201  | -92.3483529   | -92.3436116   |
| 3.0 Å, LS | -92.3474557  | -92.3387272  | -92.3236782   | -92.3147042   |
| 3.1 Å, HS | -92.3612848  | -92.3566503  | -92.3474327   | -92.3424879   |
| 3.1 Å, LS | -92.3447425  | -92.3358379  | -92.3203811   | -92.3110351   |

4 Reference energies from the CCSD(T\*)-F12B calculations on the  $[\text{Fe}^{\text{II}}(\text{NH}_3)_6]^{2+}$  model complexes in kcal/mol

| $d_{N-N} / \text{\AA}$ | $\Delta E_{\text{HL}}^{\text{UCCSD-F12B}}$ | $\Delta E_{\text{HL}}^{\text{UCCSD(T*)-F12B}}$ | $\Delta E_{\text{HL}}(\text{DK})$ | $\Delta E_{\text{HL}}^{\text{UCCSD(T*)-F12B}} + \Delta E_{\text{HL}}(\text{DK})$ |
|------------------------|--------------------------------------------|------------------------------------------------|-----------------------------------|----------------------------------------------------------------------------------|
| 2.5                    | -16.9678                                   | -7.0318                                        | 2.7643                            | -4.2675                                                                          |
| 2.6                    | -18.5519                                   | -8.7567                                        | 2.7098                            | -6.0468                                                                          |
| 2.7                    | -20.1476                                   | -10.4659                                       | 2.6602                            | -7.8057                                                                          |
| 2.8                    | -21.5542                                   | -12.0082                                       | 2.5865                            | -9.4216                                                                          |
| 2.9                    | -23.0885                                   | -13.6150                                       | 2.5470                            | -11.0680                                                                         |
| 3.0                    | -23.5710                                   | -14.4150                                       | 2.3962                            | -12.0188                                                                         |
| 3.1                    | -23.8446                                   | -15.1072                                       | 2.1977                            | -12.9095                                                                         |
